# Supplementary material for: A mesothelin microsensor based on an embedded thionine electronic medium within an imprinted polymer on an acupuncture needle electrode
Source: Royal Society of Chemistry journal article supplement (doi:10.1039/d4an00490f), 2024-01-01
Supplement: d4an00490f1.pdf [file d4an00490f1.pdf]

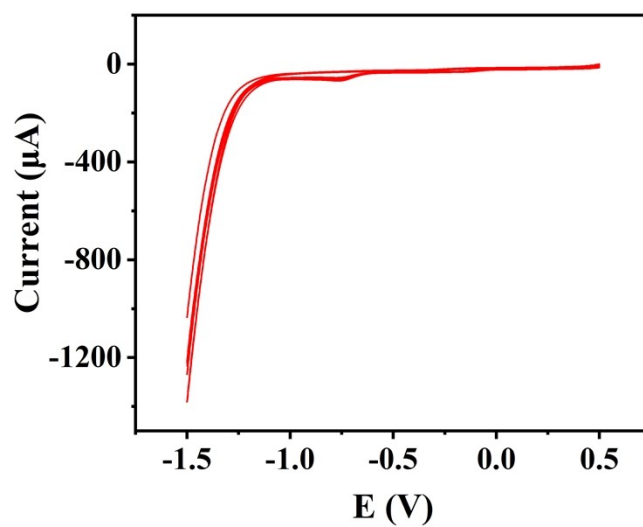

Fig. S1 The electropolymerization curve for AuNPs.

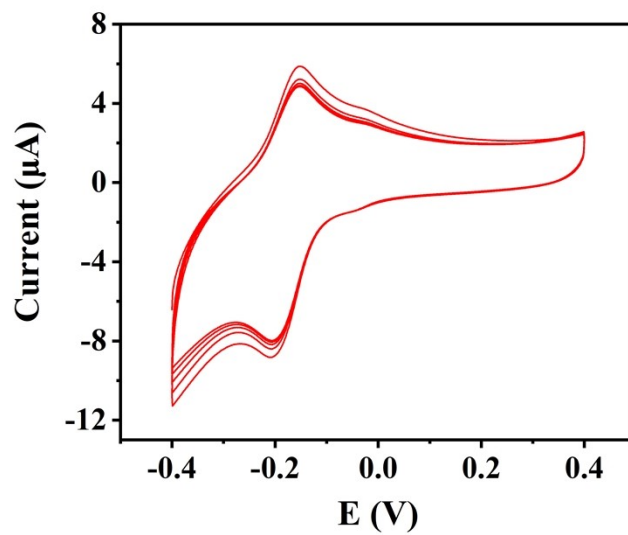

Fig. S2 The electropolymerization curve of TH.

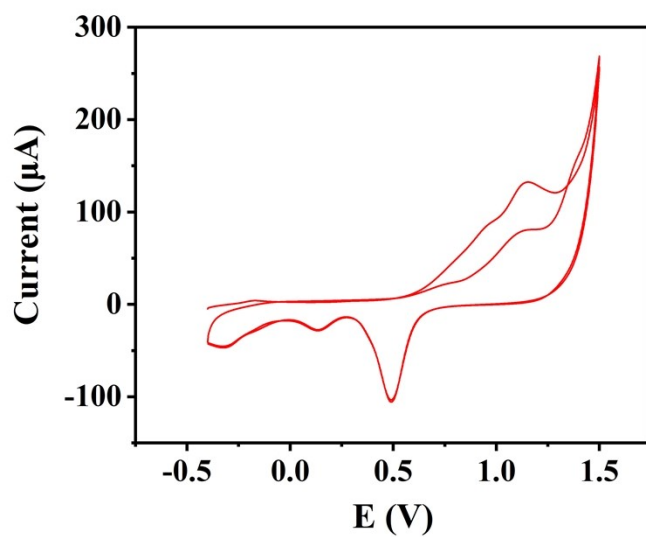

Fig. S3 The electropolymerization curve of EBT.

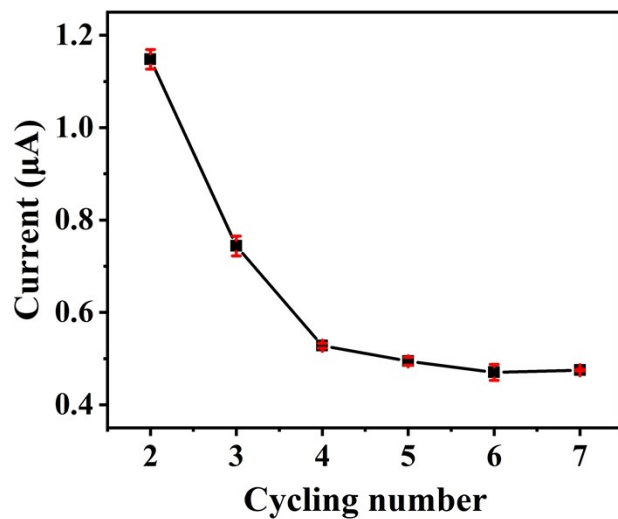

Fig. S4 The cycling number for optimization of electropolymerization EBT.

Table S1. Comparison of the prepared microsensor with other reported MSLN biosensors.

| Sensor and method | Linear range                   | LOD          | Reference |
|-------------------|--------------------------------|--------------|-----------|
| MIAS              | 20 - 110 pg/mL                 | 20 pg/mL     | 1         |
| PCTE              | 10 - $10 \times 10^{10}$ ag/mL | /            | 2         |
| ELISA             | 0.08 - 5.2 ng/mL               | /            | 3         |
| SPRi              | 9 - 120 nmol/L                 | 13.62 nmol/L | 4         |
| AN microelectrode | 0.1 - 1000 ng/mL               | 10 pg/mL     | This work |

MIAS: microfluidic immunoassay system. PCTE: gold-coated nanoporous PCTE membrane. Sandwich ELISA: enzyme linked immunosorbent assay, two antibodies (rabbit polyclonal anti-ERC/mesothelin antibody-282, mouse monoclonal antibody 7E7). SPRi: biosensor based on surface plasmon resonance imaging technique
