# Supplementary material for: A mesothelin microsensor based on an embedded thionine electronic medium within an imprinted polymer on an acupuncture needle electrode
Source: Royal Society of Chemistry journal article supplement (doi:10.1039/d4an00490f), 2024-01-01
Supplement: d4an00490f2.pdf [file d4an00490f2.pdf]

# Supporting Information

## **Mesothelin microsensor based on embedded thionine electronic media within imprinted polymer on acupuncture needle electrode**

Yi Zhang<sup>a, b, c</sup>, Xue Kong<sup>a, b</sup>, Hai-Yang Guo<sup>b</sup>, Jing Wang<sup>a, \*</sup>, Zheng-Zhi Yin<sup>b, c, \*</sup>

<sup>a</sup> College of Chemical Engineering, Zhejiang University of Technology, Hangzhou, 310014, China

<sup>b</sup> College of Biological, Chemical Sciences and Engineering, Jiaxing University, Jiaxing 314001, China

<sup>c</sup> Jiaxing Key Laboratory of Molecular Recognition and Sensing, College of Biological, Chemical Sciences and Engineering, Jiaxing University, Jiaxing 314001, China

### **Corresponding author:**

E-mail: Jingw1986@zjut.edu.cn (J. Wang); yinzhengzhi@zjxu.edu.cn (Z.-Z. Yin)

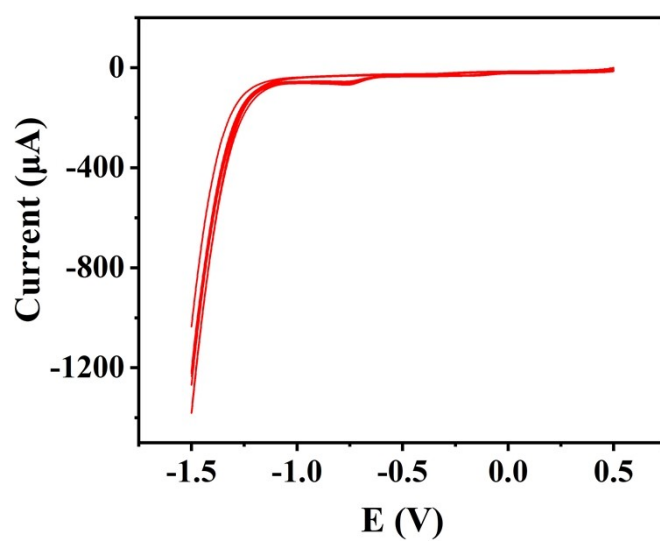

Fig. S1 The electropolymerization curve for AuNPs.

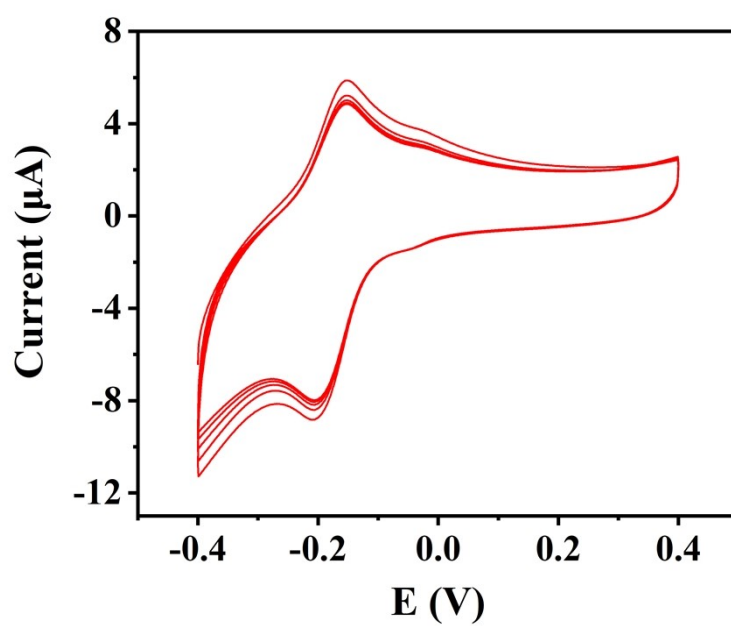

Fig. S2 The electropolymerization curve of TH.

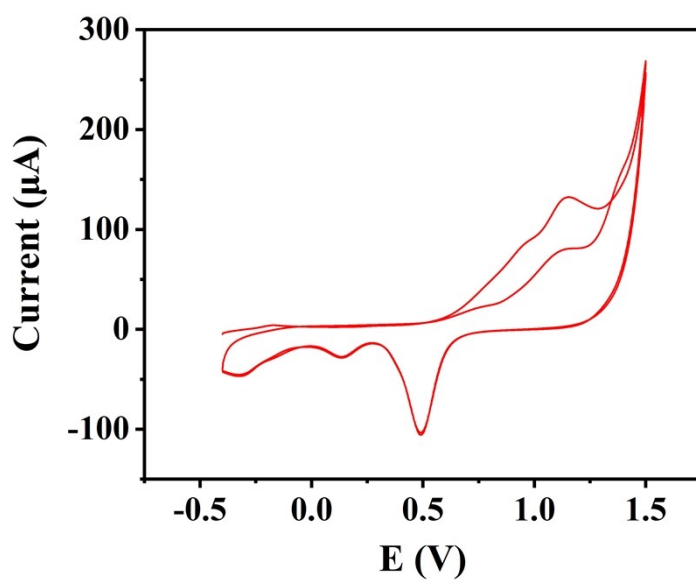

Fig. S3 The electropolymerization curve of EBT.

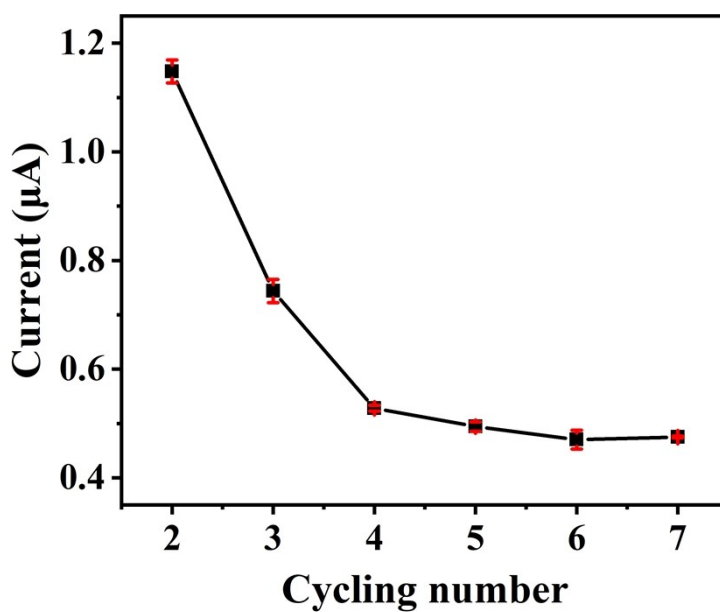

Fig. S4 The cycling number for optimization of electropolymerization EBT.

**Table S1.** Comparison of the prepared microsensor with other reported MSLN biosensors.

| Sensor and method | Linear range                      | LOD          | Reference |
|-------------------|-----------------------------------|--------------|-----------|
| MIAS              | 20 - 110 pg/mL                    | 20 pg/mL     | 1         |
| PCTE              | 10 - $10 \times 10^{10}$<br>ag/mL | /            | 2         |
| ELISA             | 0.08 - 5.2 ng/mL                  | /            | 3         |
| SPRi              | 9 - 120 nmol/L                    | 13.62 nmol/L | 4         |
| AN microelectrode | 0.1 - 1000 ng/mL                  | 10 pg/mL     | This work |

MIAS: microfluidic immunoassay system. PCTE: gold-coated nanoporous PCTE membrane. Sandwich ELISA: enzyme linked immunosorbent assay, two antibodies (rabbit polyclonal anti-ERC/mesothelin antibody-282, mouse monoclonal antibody 7E7). SPRi: biosensor based on surface plasmon resonance imaging technique

## References

1. X. Duan, L. Zhao, H. Dong, W. Zhao, S. Liu and G. Sui, *ACS Sensors*, 2019, **4**, 2952-2957.
2. S. Ahlawat, A. Nehra, V. Pandey and K. P. Singh, *Ionics*, 2019, **25**, 1887-1896.
3. K. Shiomi, H. Miyamoto, T. Segawa, Y. Hagiwara, A. Ota, M. Maeda, K. Takahashi, K. Masuda, Y. Sakao and O. Hino, *Cancer Sci.*, 2006, **97**, 928-932.
4. E. F. de Macedo, L. S. Nascimento, Y. Hou, R. Mathey and D. B. Tada, *Sensing and Bio-Sensing Research*, 2024, **43**, 100609-100618.
